# Supplementary material
Source: PubMed Central journal article supplement (PMC7498177)
Supplement: NIHMS1622179-supplement-Supplementary__Table_S2.pdf [file NIHMS1622179-supplement-Supplementary__Table_S2.pdf]

**Supplementary Table S2. Median Ki67 expression by tumor grade**

| Visit                   | Abemaciclib + ANZ  |                     |                     | Abemaciclib        |                     |                    | ANZ                |                     |                     |
|-------------------------|--------------------|---------------------|---------------------|--------------------|---------------------|--------------------|--------------------|---------------------|---------------------|
|                         | Grade 1<br>(N = 9) | Grade 2<br>(N = 24) | Grade 3<br>(N = 16) | Grade 1<br>(N = 5) | Grade 2<br>(N = 32) | Grade 3<br>(N = 5) | Grade 1<br>(N = 6) | Grade 2<br>(N = 31) | Grade 3<br>(N = 10) |
| <b>Baseline</b>         |                    |                     |                     |                    |                     |                    |                    |                     |                     |
| n                       | 9                  | 24                  | 16                  | 5                  | 32                  | 5                  | 6                  | 31                  | 10                  |
| Median, %               | 16                 | 23                  | 37                  | 15                 | 26                  | 36                 | 21                 | 24                  | 36                  |
| <b>Week 2</b>           |                    |                     |                     |                    |                     |                    |                    |                     |                     |
| n                       | 9                  | 24                  | 16                  | 5                  | 32                  | 5                  | 6                  | 31                  | 10                  |
| Median, %               | 1                  | 2                   | 3                   | 1                  | 2                   | 2                  | 3                  | 10                  | 15                  |
| <b>End of treatment</b> |                    |                     |                     |                    |                     |                    |                    |                     |                     |
| n                       | 8                  | 21                  | 13                  | 3                  | 27                  | 4                  | 6                  | 25                  | 7                   |
| Median, %               | 2                  | 4                   | 12                  | 2                  | 2                   | 2                  | 1                  | 2                   | 13                  |

Abbreviations: ANZ, anastrozole
