# Supplementary material
Source: PubMed Central journal article supplement (PMC7498177)
Supplement: NIHMS1622179-supplement-Supplementary_Table_S1.pdf [file NIHMS1622179-supplement-Supplementary_Table_S1.pdf]

**Supplementary Table S1. Molecular subtypes at baseline**

| Variable, n (%)       | Abemaciclib + ANZ<br>(n=74) | Abemaciclib<br>(n=76) | ANZ<br>(n=74) | Total<br>(N=224) |
|-----------------------|-----------------------------|-----------------------|---------------|------------------|
| <b>ITT population</b> |                             |                       |               |                  |
| <b>Subtypes, n</b>    |                             |                       |               |                  |
| Luminal A             | 5 (7)                       | 6 (8)                 | 10 (14)       | 21 (9)           |
| Luminal B             | 2 (3)                       | 12 (16)               | 5 (7)         | 19 (9)           |
| HER2                  | 1 (1)                       | 1 (1)                 | NE            | 2 (1)            |
| Basal-like            | 1 (1)                       | 1 (1)                 | NE            | 2 (1)            |
| Normal                | 2 (3)                       | 1 (1)                 | 2 (3)         | 5 (2)            |
| Missing               | 63 (85)                     | 55 (72)               | 57 (77)       | 175 (78)         |
| <b>PIK3CA</b>         |                             |                       |               |                  |
| Positive              | 21 (28)                     | 14 (18)               | 17 (24)       | 52 (23)          |
| Negative              | 25 (34)                     | 41 (54)               | 34(46)        | 100 (45)         |
| Undetermined          | 5 (7)                       | 10 (13)               | 7 (10)        | 22 (10)          |
| Missing               | 23 (31)                     | 11 (15)               | 16 (22)       | 50 (22)          |
| <b>KE population</b>  |                             |                       |               |                  |
| <b>Subtypes, n</b>    |                             |                       |               |                  |
| Luminal A             | 5 (9)                       | 5 (10)                | 9 (16)        | 19 (11)          |
| Luminal B             | 2 (3)                       | 11 (21)               | 5 (9)         | 18 (11)          |
| HER2                  | 1 (2)                       | 1 (2)                 | NE            | 2 (1)            |
| Basal-like            | 1 (2)                       | 1 (2)                 | NE            | 2 (1)            |
| Normal                | 2 (3)                       | 1 (2)                 | 1 (2)         | 4 (2)            |
| Missing               | 48 (81)                     | 33 (64)               | 41 (73)       | 122 (73)         |
| <b>PIK3CA</b>         |                             |                       |               |                  |
| Positive              | 19 (32)                     | 10 (19)               | 15 (27)       | 44 (26)          |
| Negative              | 21 (36)                     | 30 (58)               | 27 (48)       | 78 (47)          |
| Undetermined          | 5 (9)                       | 8 (15)                | 5 (9)         | 18 (11)          |
| Missing               | 14 (23)                     | 4 (8)                 | 9 (16)        | 27 (16)          |

Abbreviations: ANZ, anastrozole; KE, Ki67 evaluable patients; NE, not evaluable
